# Supplementary material
Source: Research Square preprint supplement (doi:10.21203/rs.3.rs-9256612/v1)
Supplement: Supplementary file 1 [file 7aaca42ffed0ee1caf1428e8.xlsx]

## Sheet: Table 1
Circuit optimization using a dual-luciferase assay in Nicotiana benthamiana leaves infiltrated with pC-HSL
	SV40 0xRapO	SV40 2xRapO	SV40 4xRapO	SV40 6xRapO						BP NLS 0xRapO	BP NLS 2xRapO	BP NLS 4xRapO	BP NLS 6xRapO
0 μM	0.597449	1.18511	1.3862	0.842172					0 μM	0.698593	0.843528	0.998816	0.95861
0 μM	0.942137	1.32652	1.39501	1.45432					0 μM	0.863344	1.51432	1.2246	2.14237
0 μM	0.909709	1.3979	1.57545	1.31238					0 μM	0.889591	1.30612	1.28023	1.747
0.1 μM	0.669645	0.977193	1.25643	0.715563					0.1 μM	0.648527	0.773888	1.33112	1.17963
0.1 μM	1.06514	1.05115	1.74303	1.5898					0.1 μM	1.02294	1.3672	1.20048	2.48625
0.1 μM	0.921648	0.9886	1.55499	1.48577					0.1 μM	0.996496	1.28886	1.25002	2.07419
1 μM	0.70702	1.03213	2.6478	1.73883					1 μM	0.545959	0.760165	1.6768	2.29296
1 μM	1.24564	2.49932	3.88863	4.67138					1 μM	1.05952	2.15915	3.80377	4.39906
1 μM	1.12857	1.9427	3.63627	4.05946					1 μM	0.930147	1.61541	3.12903	3.58944
10 μM	0.811836	1.12088	3.32891	2.50942					10 μM	0.694585	2.23175	1.73442	5.64026
10 μM	1.19103	3.5637	6.11442	7.817					10 μM	1.29189	3.08391	5.44223	7.31196
10 μM	1.15788	2.48881	5.01176	5.80288					10 μM	1.19381	2.61116	4.60908	6.40865
One-Way ANOVA Results									One-Way ANOVA Results
Variant	term	sum_sq	df	F	PR(>F)				Variant	term	sum_sq	df	F	PR(>F)
SV40 0xRapO	C(RapO_uM)	0.0248777	3	0.682188	0.587381				BP NLS 0xRapO	C(RapO_uM)	0.0199813	3	0.44093	0.730093
SV40 0xRapO	Residual	0.0972467	8						BP NLS 0xRapO	Residual	0.120843	8
SV40 2xRapO	C(RapO_uM)	0.185091	3	2.30855	0.153082				BP NLS 2xRapO	C(RapO_uM)	0.26183	3	3.65063	0.0635062
SV40 2xRapO	Residual	0.213803	8						BP NLS 2xRapO	Residual	0.191258	8
SV40 4xRapO	C(RapO_uM)	0.580672	3	23.9979	0.000236111				BP NLS 4xRapO	C(RapO_uM)	0.518465	3	6.26503	0.0170513
SV40 4xRapO	Residual	0.0645248	8						BP NLS 4xRapO	Residual	0.220681	8
SV40 6xRapO	C(RapO_uM)	0.870161	3	6.73603	0.0139926				BP NLS 6xRapO	C(RapO_uM)	0.714625	3	11.1291	0.00315819
SV40 6xRapO	Residual	0.34448	8						BP NLS 6xRapO	Residual	0.171233	8
Tukey HSD Pairwise Comparisons									Tukey HSD Pairwise Comparisons
Variant	group1	group2	meandiff	p-adj	lower	upper	reject		Variant	group1	group2	meandiff	p-adj	lower	upper	reject
SV40 0xRapO	0	0.1	0.0362	0.9766	-0.2521	0.3244	FALSE		BP NLS 0xRapO	0	0.1	0.0302	0.9898	-0.2911	0.3516	FALSE
SV40 0xRapO	0	1	0.096	0.7179	-0.1923	0.3843	FALSE		BP NLS 0xRapO	0	1	0.0004	1	-0.321	0.3218	FALSE
SV40 0xRapO	0	10	0.1132	0.6112	-0.175	0.4015	FALSE		BP NLS 0xRapO	0	10	0.1001	0.7552	-0.2213	0.4215	FALSE
SV40 0xRapO	0.1	1	0.0598	0.9074	-0.2284	0.3481	FALSE		BP NLS 0xRapO	0.1	1	-0.0298	0.9902	-0.3512	0.2915	FALSE
SV40 0xRapO	0.1	10	0.0771	0.8267	-0.2112	0.3654	FALSE		BP NLS 0xRapO	0.1	10	0.0699	0.8957	-0.2515	0.3912	FALSE
SV40 0xRapO	1	10	0.0172	0.9973	-0.271	0.3055	FALSE		BP NLS 0xRapO	1	10	0.0997	0.7573	-0.2217	0.421	FALSE
SV40 2xRapO	0	0.1	-0.1118	0.8356	-0.5392	0.3157	FALSE		BP NLS 2xRapO	0	0.1	-0.0292	0.9953	-0.4335	0.3751	FALSE
SV40 2xRapO	0	1	0.1193	0.8083	-0.3081	0.5468	FALSE		BP NLS 2xRapO	0	1	0.0671	0.949	-0.3372	0.4713	FALSE
SV40 2xRapO	0	10	0.2185	0.4122	-0.2089	0.646	FALSE		BP NLS 2xRapO	0	10	0.3441	0.098	-0.0602	0.7484	FALSE
SV40 2xRapO	0.1	1	0.2311	0.3691	-0.1964	0.6585	FALSE		BP NLS 2xRapO	0.1	1	0.0963	0.869	-0.308	0.5005	FALSE
SV40 2xRapO	0.1	10	0.3303	0.1393	-0.0972	0.7577	FALSE		BP NLS 2xRapO	0.1	10	0.3733	0.0707	-0.031	0.7776	FALSE
SV40 2xRapO	1	10	0.0992	0.8772	-0.3283	0.5266	FALSE		BP NLS 2xRapO	1	10	0.277	0.2043	-0.1272	0.6813	FALSE
SV40 4xRapO	0	0.1	0.0161	0.9959	-0.2187	0.2509	FALSE		BP NLS 4xRapO	0	0.1	0.0352	0.9934	-0.399	0.4695	FALSE
SV40 4xRapO	0	1	0.3632	0.0049	0.1284	0.598	TRUE		BP NLS 4xRapO	0	1	0.3684	0.0992	-0.0658	0.8027	FALSE
SV40 4xRapO	0	10	0.5083	0.0006	0.2735	0.7431	TRUE		BP NLS 4xRapO	0	10	0.4813	0.0308	0.047	0.9155	TRUE
SV40 4xRapO	0.1	1	0.3471	0.0064	0.1122	0.5819	TRUE		BP NLS 4xRapO	0.1	1	0.3332	0.1427	-0.1011	0.7675	FALSE
SV40 4xRapO	0.1	10	0.4922	0.0007	0.2573	0.727	TRUE		BP NLS 4xRapO	0.1	10	0.446	0.0443	0.0117	0.8803	TRUE
SV40 4xRapO	1	10	0.1451	0.2714	-0.0897	0.3799	FALSE		BP NLS 4xRapO	1	10	0.1128	0.8381	-0.3215	0.5471	FALSE
SV40 6xRapO	0	0.1	0.0073	1	-0.5353	0.5498	FALSE		BP NLS 6xRapO	0	0.1	0.0764	0.9161	-0.3061	0.459	FALSE
SV40 6xRapO	0	1	0.4373	0.12	-0.1052	0.9799	FALSE		BP NLS 6xRapO	0	1	0.3347	0.088	-0.0479	0.7172	FALSE
SV40 6xRapO	0	10	0.6167	0.0272	0.0741	1.1593	TRUE		BP NLS 6xRapO	0	10	0.6224	0.0036	0.2399	1.005	TRUE
SV40 6xRapO	0.1	1	0.4301	0.1274	-0.1125	0.9727	FALSE		BP NLS 6xRapO	0.1	1	0.2582	0.2135	-0.1243	0.6407	FALSE
SV40 6xRapO	0.1	10	0.6094	0.0288	0.0669	1.152	TRUE		BP NLS 6xRapO	0.1	10	0.546	0.0079	0.1635	0.9285	TRUE
SV40 6xRapO	1	10	0.1794	0.7222	-0.3632	0.7219	FALSE		BP NLS 6xRapO	1	10	0.2878	0.1525	-0.0948	0.6703	FALSE
Letter Display									Letter Display
Variant	0 μM	0.1 μM	1 μM	10 μM					Variant	0.0 μM	0.1 μM	1.0 μM	10.0 μM
SV40 0xRapO	a	a	a	a					BP NLS 0xRapO	a	a	a	a
SV40 2xRapO	a	a	a	a					BP NLS 2xRapO	a	a	a	a
SV40 4xRapO	a	a	b	b					BP NLS 4xRapO	a	a	a	b
SV40 6xRapO	a	a	a	b					BP NLS 6xRapO	a	a	a	b

## Sheet: Table 2
Nicotiana benthamiana leaf responses to infiltrated pC-HSL
	0 μM	0.1 μM	1 μM
Replicate 1	0.060304	0.578944	2.74504
Replicate 2	0.073659	1.17722	3.70667
Replicate 3	0.095614	0.836712	3.25367
Replicate 4	0.083207	1.22649	1.58914
One-Way ANOVA Results
Source	Concentration	Residual	Total
df	2	9	11
sum_sq	5.007	0.1693
F	133.05
PR(>F)	2.07e-07
Tukey HSD Pairwise Comparisons
Group 1	0 μM	0 μM	0.1 μM
Group 2	0.1 μM	1 μM	1 μM
Mean Diff (log10)	1.0741	1.5432	0.4691
p-adj	<0.001	<0.001	0.0024
Significant	TRUE	TRUE	TRUE
Letter Display
Group	0 μM	0.1 μM	1 μM
Letters	a	b	c

## Sheet: Table 3
Root response to exogenous pC-HSL in MS plate
	0 μM	0.03 μM	0.1 μM	0.3 μM	1 μM
Replicate 1	0.00917201	0.364574	0.532868	9.75114	41.5423
Replicate 2	0.0504658	0.367089	1.43717	8.56222	38.7336
Replicate 3	0.0063998	0.101766	0.600362	5.04676	11.9734
Replicate 4	0.00605044	0.0394034	0.966257	13.911	33.6454
Replicate 5	0.00345982	0.142043	0.438618	5.68573	20.9709
Replicate 6	0.0105846	0.331947	0.695392	20.734	24.6792
Replicate 7	0.0528093	2.09516	3.19463	28.6648	102.121
Replicate 8	0.0261776	0.470185	1.3601	13.231	144.537
Replicate 9	0.00762647	0.449822	1.32187	6.65015	38.8764
One-Way ANOVA Results
Source	Concentration	Residual	Total
df	4	40	44
sum_sq	67.5649	5.30954
mean_sq	16.8912	0.132738
F	127.252
PR(>F)	3.4723e-22
Tukey HSD Pairwise Comparisons
Group 1	0 μM	0 μM	0 μM	0 μM	0.03 μM	0.03 μM	0.03 μM	0.1 μM	0.1 μM	0.3 μM
Group 2	0.03 μM	0.1 μM	0.3 μM	1 μM	0.1 μM	0.3 μM	1 μM	0.3 μM	1 μM	1 μM
Mean Diff	1.3566	1.8946	2.9335	3.4938	0.5379	1.5768	2.1372	1.0389	1.5993	0.5604
p-adj	0	0	0	0	0.0254	0	0	0	0	0.0182
Lower CI	0.8661	1.404	2.4429	3.0033	0.0474	1.0863	1.6467	0.5484	1.1087	0.0698
Upper CI	1.8472	2.3851	3.424	3.9843	1.0285	2.0674	2.6277	1.5294	2.0898	1.0509
Significant	TRUE	TRUE	TRUE	TRUE	TRUE	TRUE	TRUE	TRUE	TRUE	TRUE
Letter Display
Group	0 μM	0.03 μM	0.1 μM	0.3 μM	1 μM
Letters	a	b	c	d	e

## Sheet: Table 4
Leaf response to exogenous pC-HSL in MS plate
	0 μM	1 μM	3 μM	10 μM
Replicate 1	0.050714	0.0992301	3.63808	38.0092
Replicate 2	0.0681833	0.0611693	1.55648	54.1066
Replicate 3	0.0574717	0.08531	17.5418	49.7895
Replicate 4	0.0129551	0.36207	31.9727	83.9518
Replicate 5	0.0275903	0.201162	33.8237	81.7274
Replicate 6	0.104336	0.299011	33.2018	76.0026
Replicate 7	0.0721681	0.0365747	32.5479	78.4686
Replicate 8	0.217778	0.292436	20.8516	77.9858
Replicate 9	0.123616	0.103934	21.3166	79.1452
One-Way ANOVA Results
Source	Concentration	Residual	Total
df	3	32	35
sum_sq	60.728	3.97289
mean_sq	20.2427	0.124153
F	163.047
PR(>F)	1.831e-19
Tukey HSD Pairwise Comparisons
Group 1	0 μM	0 μM	0 μM	1 μM	1 μM	10 μM
Group 2	1 μM	10 μM	3 μM	10 μM	3 μM	3 μM
Mean Diff	0.3266	3.0283	2.3949	2.7016	2.0683	-0.6333
p-adj	0.2217	0	0	0	0	0.0032
Lower CI	-0.1234	2.5782	1.9449	2.2516	1.6182	-1.0834
Upper CI	0.7767	3.4783	2.8449	3.1516	2.5183	-0.1833
Significant	FALSE	TRUE	TRUE	TRUE	TRUE	TRUE
Letter Display
Group	0 μM	1 μM	3 μM	10 μM
Letters	a	a	b	c

## Sheet: Table 5
Leaf response to bacteria secreted pC-HSL in plate
E. coli								P. putida
	0 OD	1 OD	3 OD	10 OD					0 OD	1 OD	3 OD	10 OD
Replicate 1	0.244544	1.3589	6.17063	14.5526				Replicate 1	0.19636	2.08519	7.87265	27.3034
Replicate 2	0.110678	3.56608	9.60293	24.4619				Replicate 2	0.107729	2.49581	9.54109	30.0271
Replicate 3	0.100574	1.05484	9.74473	35.0705				Replicate 3	0.12775	1.63848	7.29633	34.1178
Replicate 4	0.128643	2.85927	4.40754	12.0373				Replicate 4	0.152491	1.70535	2.63029	37.0487
Replicate 5	0.141019	1.66536	3.42472	12.9664				Replicate 5	0.0836891	1.5184	8.29762	17.4842
Replicate 6	0.105778	1.62794	3.48645	18.5138				Replicate 6	0.163218	0.822	2.29234	22.9128
One-Way ANOVA Results								One-Way ANOVA Results
Source	Concentration	Residual	Total					Source	Concentration	Residual	Total
df	3	20	23					df	3	20	23
sum_sq	15.0341	0.675668						sum_sq	17.0944	0.672036
mean_sq	5.01136	0.033783						mean_sq	5.69814	0.033602
F	148.338							F	169.578
PR(>F)	7.85593e-14							PR(>F)	2.18041e-14
Tukey HSD Pairwise Comparisons								Tukey HSD Pairwise Comparisons
Group 1	0 OD	0 OD	0 OD	1 OD	1 OD	10 OD		Group 1	0 OD	0 OD	0 OD	1 OD	1 OD	10 OD
Group 2	1 OD	10 OD	3 OD	10 OD	3 OD	3 OD		Group 2	1 OD	10 OD	3 OD	10 OD	3 OD	3 OD
Mean Diff	1.1467	2.1399	1.6275	0.9932	0.4808	-0.5124		Mean Diff	1.0847	2.3113	1.6146	1.2266	0.5299	-0.6967
p-adj	0	0	0	0	0.0011	0.0005		p-adj	0	0	0	0	0.0004	0
Lower CI	0.8496	1.8429	1.3304	0.6962	0.1838	-0.8094		Lower CI	0.7885	2.0151	1.3184	0.9303	0.2336	-0.9929
Upper CI	1.4437	2.4369	1.9245	1.2902	0.7778	-0.2154		Upper CI	1.381	2.6075	1.9108	1.5228	0.8261	-0.4005
Significant	TRUE	TRUE	TRUE	TRUE	TRUE	TRUE		Significant	TRUE	TRUE	TRUE	TRUE	TRUE	TRUE
Letter Display								Letter Display
Group	0 OD	1 OD	3 OD	10 OD				Group	0 OD	1 OD	3 OD	10 OD
Letters	a	b	c	d				Letters	a	b	c	d

## Sheet: Table 6 
Leaf response to exogenous pC-HSL in soil
	0 μM	1 μM	3 μM	10 μM	30 μM	100 μM
Replicate 1	0.142963	0.221725	1.00815	0.507844	10.3925	9.05963
Replicate 2	0.127458	0.100781	0.13513	6.87541	3.3733	15.3054
Replicate 3	0.0596117	0.171111	0.195328	3.84036	2.77343	36.7894
Replicate 4	0.0252886	0.0462895	0.0633103	2.28412	6.34379	33.4962
Replicate 5	0.0226559	0.0299882	0.660442	11.0182	22.8557	26.0193
Replicate 6	0.0286355	0.030325	0.311893	4.57782	20.0112	33.2802
One-Way ANOVA Results
Source	Concentration	Residual	Total
df	5	30	35
sum_sq	37.4261	4.47386
mean_sq	7.48521	0.149129
F	50.193
PR(>F)	1.12422e-13
Tukey HSD Pairwise Comparisons
Group 1	0 μM	0 μM	0 μM	0 μM	0 μM	1 μM	1 μM	1 μM	1 μM	10 μM	10 μM	10 μM	100 μM	100 μM	3 μM
Group 2	1 μM	10 μM	100 μM	3 μM	30 μM	10 μM	100 μM	3 μM	30 μM	100 μM	3 μM	30 μM	3 μM	30 μM	30 μM
Mean Diff	0.1593	1.823	2.6532	0.7149	2.1999	1.6637	2.4939	0.5556	2.0406	0.8302	-1.1081	0.3769	-1.9383	-0.4533	1.485
p-adj	0.9787	0	0	0.0342	0	0	0	0.1586	0	0.0096	0.0003	0.5482	0	0.3483	0
Lower CI	-0.5188	1.1449	1.9751	0.0368	1.5218	0.9856	1.8158	-0.1225	1.3625	0.1521	-1.7862	-0.3012	-2.6164	-1.1314	0.8069
Upper CI	0.8374	2.5011	3.3313	1.393	2.8781	2.3418	3.1721	1.2338	2.7188	1.5084	-0.4299	1.0551	-1.2602	0.2249	2.1632
Significant	FALSE	TRUE	TRUE	TRUE	TRUE	TRUE	TRUE	FALSE	TRUE	TRUE	TRUE	FALSE	TRUE	FALSE	TRUE
Letter Display
Group	0 μM	1 μM	3 μM	10 μM	30 μM	100 μM
Letters	a	a	b	c	c	d

## Sheet: Table 7
Leaf response to bacteria secreted pC-HSL in soil
E. coli									P. putida
	0 OD	0.1 OD	1 OD	10 OD						0 OD	0.1 OD	1 OD	10 OD
Replicate 1	0.107917	0.76136	3.3674	46.5557					Replicate 1	0.107917	0.290651	2.9425	21.3515
Replicate 2	0.138078	0.712468	1.0685	66.9382					Replicate 2	0.138078	0.268559	4.69418	38.5194
Replicate 3	0.136136	1.02674	5.56453	33.5464					Replicate 3	0.136136	0.2282	3.82251	21.2011
Replicate 4	0.0732874	0.571092	8.89496	34.2075					Replicate 4	0.0732874	0.173883	4.25423	19.756
One-Way ANOVA Results									One-Way ANOVA Results
Source	Concentration	Residual	Total						Source	Concentration	Residual	Total
df	3	12	15						df	3	12	15
Sum of Squares	14.4743	0.611223	15.0855						Sum of Squares	14.1336	0.156305	14.2899
Mean Square	4.82476	0.050935							Mean Square	4.71121	0.013025
F Value	94.7234								F Value	361.693
P-value	1.27e-08								P-value	5e-12
Tukey HSD Pairwise Comparisons									Tukey HSD Pairwise Comparisons
Group 1	0 OD	0 OD	0 OD	0.1 OD	0.1 OD	1 OD			Group 1	0 OD	0 OD	0 OD	0.1 OD	0.1 OD	1 OD
Group 2	0.1 OD	1 OD	10 OD	1 OD	10 OD	10 OD			Group 2	0.1 OD	1 OD	10 OD	1 OD	10 OD	10 OD
Mean Difference	0.8326	1.5196	2.5953	0.687	1.7627	1.0757			Mean Difference	0.3297	1.5448	2.3412	1.2151	2.0115	0.7964
Adjusted P-value	0.0011	<0.0001	<0.0001	0.0049	<0.0001	0.0001			Adjusted P-value	0.0071	<0.0001	<0.0001	<0.0001	<0.0001	<0.0001
Lower CI	0.3588	1.0458	2.1215	0.2132	1.2889	0.6019			Lower CI	0.0901	1.3052	2.1016	0.9755	1.772	0.5568
Upper CI	1.3064	1.9934	3.0691	1.1608	2.2365	1.5495			Upper CI	0.5693	1.7844	2.5808	1.4547	2.2511	1.036
Significant	TRUE	TRUE	TRUE	TRUE	TRUE	TRUE			Significant	TRUE	TRUE	TRUE	TRUE	TRUE	TRUE
Letter Display									Letter Display
Group	0 OD	0.1 OD	1 OD	10 OD					Group	0 OD	0.1 OD	1 OD	10 OD
Significance Letter	a	b	c	d					Significance Letter	a	b	c	d
