# Supplementary material
Source: Research Square preprint supplement (doi:10.21203/rs.3.rs-9256612/v1)
Supplement: Supplementary file 2 [file 7c49d36a9621d00067873f21.xlsx]

## Sheet: Table 1
Circuit optimization via dual-luciferase assay in N. benthamiana leaves infiltrated with pC-HSL
	Mean values					Fold change compared to 0 μM
	0 μM	0.1 μM	1 μM	10 μM		0.1 μM	1 μM	10 μM
SV40 0xRapO	0.816432	0.885478	1.02708	1.05358		1.08457	1.25801	1.18984
SV40 2xRapO	1.30317	1.00565	1.82471	2.39113		0.771691	1.40021	2.3777
SV40 4xRapO	1.45222	1.51815	3.3909	4.81836		1.0454	2.33498	3.17384
SV40 6xRapO	1.20296	1.4184	3.48989	5.37644		1.17909	2.90109	3.7905
BP NLS 0xRapO	0.817176	0.889322	0.845207	1.06009		1.08829	1.0343	1.19202
BP NLS 2xRapO	1.22132	1.14332	1.51157	2.64227		0.936129	1.23765	2.31106
BP NLS 4xRapO	1.16788	1.26054	2.86987	3.92858		1.07934	2.45732	3.11658
BP NLS 6xRapO	1.61599	1.75867	3.42715	6.45362		1.08829	2.12078	3.6696

## Sheet: Table 2
N. benthamiana leaf GFP responses to infiltrated pC-HSL
pC amount	Mean values	Fold change compared to 0 μM
0 μM	0.078196	1
0.1 μM	0.778685	8.20645
1 μM	2.82363	36.1095

## Sheet: Table 3
Sentinel plant root response to exogenous pC-HSL
pC amount	Mean values	Fold change compared to 0 μM
0 μM	0.019194	1
0.03 μM	0.484665	25.2509
0.1 μM	1.17192	61.0566
0.3 μM	12.4708	649.722
1 μM	50.7866	2645.97

## Sheet: Table 4
Sentinel plant leaf response to exogenous pC-HSL
	Mean values	Fold change compared to 0 μM
0 μM	0.081646	1
1 μM	0.171211	2.09699
3 μM	21.8278	267.348
10 μM	68.7985	842.646

## Sheet: Table 5
Sentinel plant leaf response to bacteria-secreted pC-HSL in plate
E. coli	Mean values	Fold change compared to OD 0
OD 0	0.13854	1
OD 1	2.02207	14.5956
OD 3	6.1395	44.3159
OD 10	19.6004	141.479
P. putida	Mean values	Fold change compared to OD 0
OD 0	0.13854	1
OD 1	1.71087	12.3493
OD 3	6.32172	45.631
OD 10	28.149	203.183

## Sheet: Table 6 
Leaf response to exogenous pC-HSL in soil
pC amount	Mean values	Fold change compared to 0 μM
0 μM	0.0677687	1
1 μM	0.100037	1.47614
3 μM	0.395708	5.83908
10 μM	4.85063	71.576
30 μM	10.9583	161.701
100 μM	25.6583	378.615

## Sheet: Table 7
Leaf response to bacteria secreted pC-HSL in soil
E. coli	Mean values	Fold change compared to OD 0
OD 0	0.112941	1
OD 0.1	0.78	7.09091
OD 1	4.72	42.9091
OD 10	45.31	411.909
P. putida	Mean values	Fold change compared to OD 0
OD 0	0.112941	1
OD 0.1	0.24	2.18182
OD 1	3.93	35.7273
OD 10	25.2	229.091

## Sheet: Table 8
Part	Type	DNA sequences
GeNL	Luciferase reporter	ATGGTGAGCAAGGGCGAGGAGGATAACATGGCCTCTCTCCCAGCGACACATGAGTTACACATCTTTGGCTCCATCAACGGTGTGGACTTTGACATGGTGGGTCAGGGCACCGGCAATCCAAATGATGGTTATGAGGAGTTAAACCTGAAGTCCACCAAGGGTGACCTCCAGTTCTCCCCCTGGATTCTGGTCCCTCATATCGGGTATGGCTTCCATCAGTACCTGCCCTACCCTGACGGGATGTCGCCTTTCCAGGCCGCCATGGTAGATGGCTCCGGATACCAAGTCCATCGCACAATGCAGTTTGAAGATGGTGCCTCCCTTACTGTTAACTACCGCTACACCTACGAGGGAAGCCACATCAAAGGAGAGGCCCAGGTGAAGGGGACTGGTTTCCCT…
NLuc	Luciferase reporter	atggtattcacactcgaagatttcgttggggactggcgacagacagccggctacaacctggaccaagtccttgaacagggaggtgtgtccagtttgtttcagaatctcggggtgtccgtaactccgatccaaaggattgtcctgagcggtgaaaatgggctgaagatcgacatccatgtcatcatcccgtatgaaggtctgagcggcgaccaaatgggccagatcgaaaaaatttttaaggtggtgtaccctgtggatgatcatcactttaaggtgatcctgcactatggcacactggtaatcgacggggttacgccgaacatgatcgactatttcggacggccgtatgaaggcatcgccgtgttcgacggcaaaaagatcactgtaacagggaccctg…
0xRpaO:min35S	Minimal promoter	GCAAGACCCTTCCTCTATATAAGGAAGTTCATTTCATTTGGAGAGGACA
2xRpaO:min35S	pC-HSL responsive promoter	ACCTGTCCGATCGGACAATACACCTGTCCGATCGGACAATACGCAAGACCCTTCCTCTATATAAGGAAGTTCATTTCATTTGGAGAGGACA
4xRpaO:min35S	pC-HSL responsive promoter	ACCTGTCCGATCGGACAATACACCTGTCCGATCGGACAATACACCTGTCCGATCGGACAATACACCTGTCCGATCGGACAATACGCAAGACCCTTCCTCTATATAAGGAAGTTCATTTCATTTGGAGAGGACA
6xRpaO:min35S	pC-HSL responsive promoter	ACCTGTCCGATCGGACAATACACCTGTCCGATCGGACAATACACCTGTCCGATCGGACAATACACCTGTCCGATCGGACAATACACCTGTCCGATCGGACAATACACCTGTCCGATCGGACAATACGCAAGACCCTTCCTCTATATAAGGAAGTTCATTTCATTTGGAGAGGACA
TMVΩ	Translational enhancer	ACAATTACCAACAACAACAAACAACAAACAACATTACAATTACTATTTACAATTAC
2xGFP	Fluorecent reporter	ATGGTGAGCaagggcgaggagctgttcaccggggtggtgcccatcctggtcgagctggacggcgacgtaaacggccacaagttcagcgtgtccggcgagggcgagggcgatgccacctacggcaagctgaccctgaagttcatctgcaccaccggcaagctgcccgtgccctggcccaccctcgtgaccaccctgacctacggcgtgcagtgcttcagccgctaccccgaccacatgaagcagcacgacttcttcaagtccgccatgcccgaaggctacgtccaggagcgcaccatcttcttcaaggacgacggcaactacaagacccgcgccgaggtgaagttcgagggcgacaccctggtgaaccgcatcgagctgaagggcatcgacttcaaggag…
N7 NLS	Nuclear localization sequence	GCTGCAGCGGCCGAATTCAAGCGTGAAGAGCAAGCAAGGAAAGCTAAGGTGAACAATGAGAAAAAGACGGAAATAGTGAAACCAGAGAGTTGTAGCAATGAAGGAGATGTCAAGGATCTGAAAAGAAAGGACTCTGAGGATGGAAACGAGGGTGAGGAAGAAGAAGCTTCTTCGAAACCGAAAAAGCCAAAAGTTGCTCTTTCTCATCTTCAGGACATTGACGACACAGAAGCTGATCAAGAAGAAGAGTAA
tHSP	Terminator	atatgaagatgaagatgaaatatttggtgtgtcaaataaaaaggttgtgtgcttaagtttgtgtttttttcttggcttgttgtgttatgaatttgtggctttttctaatattaaatgaatgtaacatctcattataatgaataaacaaatgtttctataatccattgtgaatgttttgttggatctcttctccagcatataactactgtatgtgctatggtatggactatggaatatgattaaagataag
pUBQ10	Constitutive promoter	atgcatatgagtctagctcaacagagcttttaacccaaattggtacaatagaatacaactttagatcataattctcaaaagaaagagattccttagctattctatctgccactccatttccttctcggcttgtatgcacaagcataaaatcctcaaacttgctaagtagatactttatgtcttggataattggattgagacttgacaagcataactttcatgtaaccaaagacacaagttgctgagaatccacctcaaaaatgatcttcctataattgaatcgggataatgacagcacagcccatctaagagcctccacttctacttccagcacgcttcttacttttaccacagctcttgcacctaaccataacaccttccctgtatgatcgcgaagca…
SV40 NLS	Nuclear localization sequence	CCAAAGAAGAAGAGAAAGGTT
BP NLS	Nuclear localization sequence	AAGCGTACTGCTGATGGTTCAGAGTTTGAAAGTCCAAAGAAGAAGAGAAAGGTT
VP16	Transcriptional activating domain	GCCCCCCCGACCGATGTCAGCCTGGGGGACGAGCTCCACTTAGACGGCGAGGACGTGGCGATGGCGCATGCCGACGCGCTAGACGATTTCGATCTGGACATGTTGGGGGACGGGGATTCCCCGGGGCCGGGATTTACCCCCCACGACTCCGCCCCCTACGGCGCTCTGGATATGGCCGACTTCGAGTTTGAGCAGATGTTTACCGATGCCCTTGGAATTGACGAGTACGGTGGG
GGGS linker	Flexible linker	GGAGGTGGAGGTTCT
RpaR (plant codon optimized)	pC-HSL reciever	ATGATTGTGGGTGAAGATCAGCTGTGGGGTCGTCGTACACTGGAATTTGTTGATAGCGTTGAACGTCTGGAAGCACCGGCACTGATTAGCCGTTTTGAAAGCCTGATTGCAAGCTGTGGTTTTACCGCCTATATCATGGCAGGTCTGCCGAGCCGTAATGCCGGTCTGCCGGAACTGACCCTGGCAAATGGTTGGCCTCGTGATTGGTTTGATCTGTATGTTAGCGAAAACTTTAGCGCAGTTGATCCGGTTCCGCGTTATGGTGCAACCACTGTTCATCCGTTTGTTTGGAGTGATGCACCGTATGATCGTGACCGTGATCAGGCAGCACATCGTGTTATGACCCGTGCAGCAGAATTTGGTCTGGTTGAAGGTTATTGTATTCCGCTGCATTACGAT…
29-1_RC12a	Membrane localization sequence	GGATCGGGCTGCCGCAGCGGCAGCAGCCGCAGCAGGTTTGGTGAGGACATAAATGGCGTATATGATCCCAGGAATATACCCAAGTAGCGTCAAAACCAAACATATCCAAAACTCAACCTGCAACAAAATTCATAATTTCAACTTTTAATTTCTAGTGTGGATAAATGTAAAAAAAGAACCATATTTGACTAAAGTATAAGATTAATTAACCAAAATAAAACTCAGTCTAAATATGAGAGGAAAGATAAATACCCCGCAACCAAATCTGAGAAAGACACCGAGTGGAGGCAAGAGGATGGCGATAATAATATCAACGAAAGTAGCTGTACTCAT
tdTomato	Fluorecent reporter	cttgtacaactcgtccataccgtagaggaagaggtggtggcggccctcggaacgctcgtactgttcgacaatggtgtaatcctcgttgtgggaggtaatgtccaacttggtatcaacgtagtaataaccaggcaattgaacgggtttcttggccatgtagatggtcttaaactccacgaggtaatgtccaccgtccttcaacttcaatgcctggtgaatctcgcccttcaacactccatcgcggggatacaagcgctctgttgaagcctcccagcccatagtcttcttctgcataactgggccgtctggtgggaaattggttccacgcattttgaccttgtagataagcgtaccatcttgaagggaggagtcttgggtgactgtaaccaaaccaccgtc…
tOCS	Terminator	TTGCATGCCGGTCCTGCTGAGCCTCGACATGTTGTCGCAAAATTCGCCCTGGACCCGCCCAACGATTTGTCGTCACTGTCAAGGTTTGACCTGCACTTCATTTGGGGCCCACATACACCAAAAAAATGCTGCATAATTCTCGGGGCAGCAAGTCGGTTACCCGGCCGCCGTGCTGGACCGGGTTGAATGGTGCCCGTAACTTTCGGTAGAGCGGACGGCCAATACTCAACTTCAAGGAATCTCACCCATGCGCGCCGGCGGGGAACCGGAGTTCCCTTCAGTGAgCGTTATTAGTTCGCCGCTCGGTGTGTCGTAGATACTAGCCCCTGGGGCaCTTTTGAAATTTGAATAAGATTTATGTAATCAGTCTTTTAGGTTTGACCGGTTCTGCCGCTTTTT…
BASTA pMAS-BlpR-Tmas	Selection marker	TTTTCAAATCAGTGCGCAAGACGTGACGTAAGTATCCGAGTCAGTTTTTATTTTTCTACTAATTTGGTCGTTTATTTCGGCGTGTAGGACATGGCAACCGGGCCTGAATTTCGCGGGTATTCTGTTTCTATTCCAACTTTTTCTTGATCCGCAGCCATTAACGACTTTTGAATAGATACGCTGACACGCCAAGCCTCGCTAGTCAAAAGTGTACCAAACAACGCTTTACAGCAAGAACGGAATGCGCGTGACGCTCGCGGTGACGCCATTTCGCCTTTTCAGAAATGGATAAATAGCCTTGCTTCCTATTATATCTTCCCAAATTACCAATACATTACACTAGCATCTGAATTTCATAACCAATCTCGATACACCAAATCGAATCGATGAGCCCAGAAC…
FASTred	Selection marker	AATGTCGCGGAACAAATTTTAAAACTAAATCCTAAATTTTTCTAATTTTGTTGCCAATAGTGGATATGTGGGCCGTATAGAAGGAATCTATTGAAGGCCCAAACCCATACTGACGAGCCCAAAGGTTCGTTTTGCGTTTTATGTTTCGGTTCGATGCCAACGCCACATTCTGAGCTAGGCAAAAAACAAACGTGTCTTTGAATAGACTCCTCTCGTTAACACATGCAGCGGCTGCATGGTGACGCCATTAACACGTGGCCTACAATTGCATGATGTCTCCATTGACACGTGACTTCTCGTCTCCTTTCTTAATATATCTAACAAACACTCCTACCTCTTCCAAAATATATACACATCTTTTTGATCAATCTCTCATTCAAAATCTCATTCTCTCTAGTA…
RpaI	pC-HSL synthesis pathway gene	atgcaggttcatgtcatccgtcgagagaaccgcgcgctctatgccggtctgctcgaaaagtacttccgcatccgtcaccagatctacgtcgtcgagcgcggctggaaggagctcgatcggccggatggccgcgagatcgatcagttcgacaccgaagacgccgtgtatctgctcggcgtcgacaatgacgacatcgtcgccggcatgcggatggtgccgaccacgtcaccgacgctcctcagcgacgtcttcccgcagcttgcgctggcaggcccggtgcggcggccggatgcctacgagctgtcgcggatcttcgtggtaccgcgcaagcgcggcgagcatggcggcccgcgcgccgaagccgtgatccaggccgccgcgatggagtacggcctgtcg…
4CL	pC-HSL synthesis pathway gene	atggacgccatgaccgatcccattacattcgccgctactgccgccgggcgcgacgcggctcatccgctgcgcgacatttctttcggcgagataggtatcgctaccgagcgaaagccggacggcacgatctacgtgcgctcgaccaccacgctcaccgactatccggtgcggattaccgaccggctgcatcacttcgccgagacggcgcccgaccgggtgttcatggccgagcggaacggtgagggcggctggcgcaggatcagctatgccgagatgctgcgcgccgcgcagaccatcgcctcggcgctgatcgcgcgcggactgtcggccgaacggccggtgatgattctgtccggtaattcgatcgaccatgcgatggtgatgttcggcgcgctgtat…
TAL	pC-HSL synthesis pathway gene	atgctggccatgagcccgccgaaaccggcagtggaactggatcgtcatattgatctggaccaggcacacgctgttgcaagtggcggtgcacgtatcgtcctggcaccgccggcccgtgatcgctgccgtgcatccgaagctcgtctgggtgcagtcattcgtgaagctcgccatgtgtatggcctgaccacgggttttggtccgctggcaaaccgtctgatcagcggtgaaaatgtgcgcaccctgcaagctaacctggttcatcacctggcctctggcgtgggtccggttctggattggaccacggcacgtgcaatggtcctggcacgcctggtgagcattgcacaaggtgccagtggtgcatccgaaggcaccattgcgcgtctgatcgatctgctg…
J23101 (P1m)	pC-HSL production promoter	TTTACAGCTAGCTCAGTCCTAGGTATTATGCTAGC
T12m	pC-HSL production terminator	TTCAGCCAAAAAACTTAAGACCGCCGGTCTTGTCCACTACCTTGCAGTAATGCGGTGGACAGGATCGGCGGTTTTCTTTTCTCTTCTCAA
PRpa (P66m)	pC-HSL responsive promoter in the bacteria pC-HSL biosensor	AACGATCGTTGGCTGACCTGTCCGATCGGACAATATTACGCAAGAAAATGGTTTGTTACTTTCGAATAAA
B0034 (U3d)	RBS in the bacteria pC-HSL biosensor	AGAGAAAGAGGAGAAATACTA
sfGFP (C3m)	GFP reporter in the bacteria pC-HSL biosensor	ATGCGTAAAGGCGAAGAGCTGTTCACTGGTGTCGTCCCTATTCTGGTGGAACTGGATGGTGATGTCAACGGTCATAAGTTTTCCGTGCGTGGCGAGGGTGAAGGTGACGCAACTAATGGTAAACTGACGCTGAAGTTCATCTGTACTACTGGTAAACTGCCGGTACCTTGGCCGACTCTGGTAACGACGCTGACTTATGGTGTTCAGTGCTTTGCTCGTTATCCGGACCATATGAAGCAGCATGACTTCTTCAAGTCCGCCATGCCGGAAGGCTATGTGCAGGAACGCACGATTTCCTTTAAGGATGACGGCACGTACAAAACGCGTGCGGAAGTGAAATTTGAAGGCGATACCCTGGTAAACCGCATTGAGCTGAAAGGCATTGACTTTAAAGAAGAT…
T14m	Terminator in the bacteria pC-HSL biosensor	GACGAACAATAAGGCCTCCCTAACGGGGGGCCTTTTTTATTGATAACAAAA
J23106 (P4d)	Constitutive promoter in the bacteria pC-HSL biosensor	TTTACGGCTAGCTCAGTCCTAGGTATAGTGCTAGC
BCD8 (U5d)	RBS in the bacteria pC-HSL biosensor	GGGCCCAAGTTCACTTAAAAAGGAGATCAACAATGAAAGCAATTTTCGTACTGAAACATCTTAATCATGCATCGGACCGTTTCT
RpaR (C70m)	pC-HSL reciever and transcriptional activator in the bacteria pC-HSL biosensor	ATGATTGTGGGTGAAGATCAGCTGTGGGGTCGTCGTACACTGGAATTTGTTGATAGCGTTGAACGTCTGGAAGCACCGGCACTGATTAGCCGTTTTGAAAGCCTGATTGCAAGCTGTGGTTTTACCGCCTATATCATGGCAGGTCTGCCGAGCCGTAATGCCGGTCTGCCGGAACTGACCCTGGCAAATGGTTGGCCTCGTGATTGGTTTGATCTGTATGTTAGCGAAAACTTTAGCGCAGTTGATCCGGTTCCGCGTTATGGTGCAACCACTGTTCATCCGTTTGTTTGGAGTGATGCACCGTATGATCGTGACCGTGATCAGGCAGCACATCGTGTTATGACCCGTGCAGCAGAATTTGGTCTGGTTGAAGGTTATTGTATTCCGCTGCATTACGAT…
T2m	Terminator in the bacteria pC-HSL biosensor	AACGCATGAGAAAGCCCCCGGAAGATCACCTTCCGGGGGCTTTTTTATTGCGC
